# Supplementary material
Source: PubMed Central journal article supplement (PMC11010628)
Supplement: mmc1.pdf [file mmc1.pdf]

# **Capacity for the management of kidney failure in the International Society of Nephrology Western Europe region: Report from the 2023 ISN Global Kidney Health Atlas (ISN-GKHA)**

## **Supplementary Tables and Figure**

**Table S1.** Workforce (specialist physician, doctor, and nurse) prevalences in the ISN Western Europe region.

**Table S2.** Healthcare system funding structure for kidney replacement therapy in the ISN Western Europe region [n (100%)].

**Table S3.** Availability of in-center hemodialysis, home hemodialysis, and dialysis in the ISN Western Europe region [n (100%)].

**Table S4.** Availability of choice-restricted conservative kidney management\* in the ISN Western Europe region [n (100%)].

**Table S5.** Barriers to optimal kidney care, overall and in the ISN Western Europe region [n (100%)].

**Table S6.** National health strategies for non-communicable diseases and CKD-specific policies in the ISN Western Europe region [n (100%)].

**Table S7.** Commonest causes of death among people receiving hemodialysis in the ISN Western Europe region [n (100%)].

**Table S8.** Commonest causes of death among people receiving peritoneal dialysis in the ISN Western Europe region [n (100%)].

**Table S9.** Commonest causes of hospitalization amongst people receiving hemodialysis in the ISN Western Europe region [n (100%)].

**Table S10.** Commonest causes of hospitalization amongst people receiving peritoneal dialysis in the ISN Western Europe region [n (100%)].

**Figure S1.** Country-level scorecard on the availability of KRT, CKM, funding for medications, registry, advocacy group, nephrologists and nephrology trainees in the ISN Western Europe region in 2019 and 2023.

**Table S1.** Workforce (specialist physician, doctors, and nurse) prevalences in the ISN Western Europe region\*\*46

|                | Specialist physician prevalence<br>(per 1000 population) |        |                       | Medical doctor prevalence<br>(per 1000 population) |        |                       |     | Nurse prevalence<br>(per 1000 population) |                       |  |  |
|----------------|----------------------------------------------------------|--------|-----------------------|----------------------------------------------------|--------|-----------------------|-----|-------------------------------------------|-----------------------|--|--|
|                | N                                                        | Median | [Interquartile range] | N                                                  | Median | [Interquartile range] | N   | Median                                    | [Interquartile range] |  |  |
| Overall        | 161                                                      | 1.95   | [0.42 - 3.00]         | 159                                                | 17.74  | [3.81 - 32.77]        | 159 | 36.20                                     | [14.40 - 66.61]       |  |  |
| Western Europe | 21                                                       | 3.87   | [3.27 - 4.25]         | 21                                                 | 42.25  | [34.90 - 50.47]       | 21  | 117.80                                    | [88.53 - 167.80]      |  |  |

Data are presented as median (interquartile range).

Abbreviations: ISN, International Society of Nephrology

\*; prevalence shown per 1,000 population

**Table S2.** Healthcare system funding structure for kidney replacement therapy, overall and in the ISN Western Europe region [n (%)].

|                | Publicly funded by government and free at the point of delivery | Publicly funded by government but with some fees at the point of delivery | A mix of publicly funded (whether or not publicly funded component is free at point of delivery) and private systems | Solely private and out-of-pocket | Solely private through health insurance providers | Multiple systems - programs provided by government, NGOs, and communities | Other | N/A   | Total |
|----------------|-----------------------------------------------------------------|---------------------------------------------------------------------------|----------------------------------------------------------------------------------------------------------------------|----------------------------------|---------------------------------------------------|---------------------------------------------------------------------------|-------|-------|-------|
| Overall        | 74 (45)                                                         | 32 (19)                                                                   | 38 (23)                                                                                                              | 7 (4)                            | 2 (1)                                             | 9 (5)                                                                     | 3 (2) | 1 (1) | 166   |
| Western Europe | 19 (86)                                                         | 0 (0)                                                                     | 1 (5)                                                                                                                | 0 (0)                            | 1 (5)                                             | 1 (5)                                                                     | 0 (0) | 0 (0) | 22    |

Abbreviations: ISN, International Society of Nephrology; NGOs, non-governmental organizations

**Table S3.** Availability of in-center hemodialysis, home hemodialysis, and peritoneal dialysis in the ISN Western Europe region [n (%)].

|                | In-center Hemodialysis |          |       | Home Hemodialysis |         |       | Peritoneal Dialysis overall |          |       | Type of Peritoneal Dialysis available |                      |                 |       |
|----------------|------------------------|----------|-------|-------------------|---------|-------|-----------------------------|----------|-------|---------------------------------------|----------------------|-----------------|-------|
|                | No                     | Yes      | Total | No                | Yes     | Total | No                          | Yes      | Total | Acute PD only                         | Acute and chronic PD | Chronic PD only | Total |
| Overall        | 3 (2)                  | 162 (98) | 165   | 116 (70)          | 49 (30) | 165   | 35 (21)                     | 130 (79) | 165   | 4 (3)                                 | 86 (66)              | 40 (31)         | 130   |
| Western Europe | 0 (0)                  | 22 (100) | 22    | 4 (18)            | 18 (82) | 22    | 0 (0)                       | 22 (100) | 22    | 0 (0)                                 | 15 (68)              | 7 (32)          | 22    |

Abbreviations: ISN, International Society of Nephrology; PD, peritoneal dialysis

**Table S4.** Availability of choice-restricted conservative kidney management\* in the ISN Western Europe region [n (%)].

|                | Generally available | Generally not available | N/A (not available) | Unknown | Total |
|----------------|---------------------|-------------------------|---------------------|---------|-------|
| Overall        | 66 (40)             | 57 (35)                 | 26 (16)             | 16 (10) | 165   |
| Western Europe | 9 (41)              | 0 (0)                   | 4 (18)              | 9 (41)  | 22    |

Abbreviations: ISN, International Society of Nephrology

\* This means where there are no resource constraints to prevent or limit access to kidney replacement therapy.

**Table S5.** Barriers to optimal kidney care, overall and in the ISN Western Europe region [n (%)].

|                | Geography (distance from care or prolonged travel time) | Physician (availability, access, knowledge, attitude) | Patient (knowledge, attitude) | Nephrologist (availability) | Healthcare system (availability, access, capability) | Lack of political will and enabling policies | Economic factors (limited funding, poor reimbursement mechanisms) | Other | Total |
|----------------|---------------------------------------------------------|-------------------------------------------------------|-------------------------------|-----------------------------|------------------------------------------------------|----------------------------------------------|-------------------------------------------------------------------|-------|-------|
| Overall        | 98 (59)                                                 | 118 (71)                                              | 125 (75)                      | 112 (67)                    | 102 (61)                                             | 88 (53)                                      | 99 (59)                                                           | 4 (2) | 167   |
| Western Europe | 9 (41)                                                  | 11 (50)                                               | 12 (55)                       | 13 (59)                     | 7 (32)                                               | 10 (45)                                      | 4 (18)                                                            | 1 (5) | 22    |

Abbreviations: ISN, International Society of Nephrology

**Table S6.** National health strategies for non-communicable diseases and CKD-specific policies in the ISN Western Europe region [n (%)].

|                | Non-communicable diseases |               |                                                 |         | National Strategy for improving CKD care |         |                                              |                                                                                              |         | Availability of CKD-specific policies |         |         |       |
|----------------|---------------------------|---------------|-------------------------------------------------|---------|------------------------------------------|---------|----------------------------------------------|----------------------------------------------------------------------------------------------|---------|---------------------------------------|---------|---------|-------|
|                | No                        | Yes, in place | Under development but not yet being implemented | Unknown | Total                                    | No      | Yes, a national CKD-specific strategy exists | Yes, but the CKD strategy is incorporated into an NCD strategy that includes other diseases. | Unknown | No                                    | Yes     | Unknown | Total |
| Overall        | 29 (18)                   | 91 (56)       | 19 (12)                                         | 23 (14) | 162                                      | 61 (38) | 41 (25)                                      | 47 (29)                                                                                      | 13 (8)  | 91 (56)                               | 60 (37) | 11 (7)  | 162   |
| Western Europe | 3 (14)                    | 14 (64)       | 1 (5)                                           | 4 (18)  | 22                                       | 10 (45) | 5 (23)                                       | 5 (23)                                                                                       | 2 (9)   | 11 (50)                               | 7 (32)  | 4 (18)  | 22    |

Abbreviations: ISN, International Society of Nephrology; CKD, chronic kidney failure; NCD, non-communicable diseases

**Table S7.** Commonest causes of death among people receiving hemodialysis in the ISN Western Europe region [n (%)].

|                   | Cardiovascular disease<br>(ischemic heart disease,<br>arrhythmia, cerebrovascular<br>disease) | Infection (access-related<br>infection, infected AVF/AVG,<br>catheter-related bacteremia) | Infection (other<br>sources, pneumonia,<br>gangrene of limbs, etc.) | Malignancy | Dialysis<br>withdrawal (due to<br>social reasons) | Dialysis<br>withdrawal (due<br>to cost of care) | Others | Unknown | Total |
|-------------------|-----------------------------------------------------------------------------------------------|-------------------------------------------------------------------------------------------|---------------------------------------------------------------------|------------|---------------------------------------------------|-------------------------------------------------|--------|---------|-------|
| Overall           | 123 (77)                                                                                      | 17 (11)                                                                                   | 1 (1)                                                               | 0 (0)      | 0 (0)                                             | 6 (4)                                           | 1 (1)  | 11 (7)  | 159   |
| Western<br>Europe | 21 (95)                                                                                       | 0 (0)                                                                                     | 0 (0)                                                               | 0 (0)      | 0 (0)                                             | 0 (0)                                           | 0 (0)  | 1 (5)   | 22    |

Abbreviations: ISN, International Society of Nephrology; CKD, chronic kidney failure; AVF, arteriovenous fistula; AVG, arteriovenous graft

**Table S8.** Commonest causes of death among people receiving peritoneal dialysis in the ISN Western Europe region [n (%)].

|                   | Cardiovascular disease<br>(ischemic heart disease,<br>arrhythmia, cerebrovascular<br>disease) | Infection (access-related<br>infection, infected<br>AVF/AVG, catheter-related<br>bacteremia) | Infection (other<br>sources, pneumonia,<br>gangrene of limbs,<br>etc.) | Malignancy | Dialysis<br>withdrawal (due<br>to social reasons) | Dialysis<br>withdrawal (due<br>to cost of care) | Others | Unknown | Total |
|-------------------|-----------------------------------------------------------------------------------------------|----------------------------------------------------------------------------------------------|------------------------------------------------------------------------|------------|---------------------------------------------------|-------------------------------------------------|--------|---------|-------|
| Overall           | 85 (66)                                                                                       | 19 (15)                                                                                      | 4 (3)                                                                  | 0 (0)      | 1 (1)                                             | 3 (2)                                           | 1 (1)  | 15 (12) | 128   |
| Western<br>Europe | 19 (86)                                                                                       | 0 (0)                                                                                        | 0 (0)                                                                  | 0 (0)      | 0 (0)                                             | 0 (0)                                           | 0 (0)  | 3 (14)  | 22    |

Abbreviations: ISN, International Society of Nephrology; AVF, arteriovenous fistula; AVG, arteriovenous graft;

**Table S9.** Commonest causes of hospitalization amongst people receiving hemodialysis in the ISN Western Europe region [n (%)].

|                   | Cardiovascular disease (ischemic heart<br>disease, arrhythmia, cerebrovascular<br>disease) | Access malfunction (malfunction<br>AVF/AVG, or blocked central<br>venous catheter) | Access-related infection (infected<br>AVF/AVG, CVC catheter-related<br>bacteremia) | Infection (other sources,<br>pneumonia, gangrene of<br>limbs, etc.) | Others | Unknown | Total |
|-------------------|--------------------------------------------------------------------------------------------|------------------------------------------------------------------------------------|------------------------------------------------------------------------------------|---------------------------------------------------------------------|--------|---------|-------|
| Overall           | 48 (30)                                                                                    | 28 (18)                                                                            | 51 (32)                                                                            | 15 (9)                                                              | 2 (1)  | 15 (9)  | 159   |
| Western<br>Europe | 13 (59)                                                                                    | 3 (14)                                                                             | 0 (0)                                                                              | 2 (9)                                                               | 0 (0)  | 4 (18)  | 22    |

Abbreviations: ISN, International Society of Nephrology; AVF, arteriovenous fistula; AVG, arteriovenous graft; CVC, central venous catheter

**Table S10.** Commonest causes of hospitalization amongst people receiving peritoneal dialysis in the ISN Western Europe region [n (%)].

|                | Cardiovascular disease (ischemic heart disease, arrhythmia, cerebrovascular disease) |      | Access malfunction (PD catheter block, catheter tip migration) |      | PD-related infection (peritonitis, exit-site or tunnel tract infection) |      | Infection (other sources, pneumonia, gangrene of limbs, etc.) |      | Others | Unknown |      | Total |
|----------------|--------------------------------------------------------------------------------------|------|----------------------------------------------------------------|------|-------------------------------------------------------------------------|------|---------------------------------------------------------------|------|--------|---------|------|-------|
| Overall        | 27                                                                                   | (21) | 17                                                             | (13) | 65                                                                      | (51) | 5                                                             | (4)  | 0 (0)  | 14      | (11) | 128   |
| Western Europe | 7                                                                                    | (32) | 3                                                              | (14) | 5                                                                       | (23) | 3                                                             | (14) | 0 (0)  | 4       | (18) | 22    |

Abbreviations: ISN, International Society of Nephrology; PD, peritoneal dialysis

**Figure S1:** Country-level scorecard on the availability of KRT, CKM, funding for medications, registry, advocacy group, nephrologists and nephrology trainees in the ISN Western Europe region in 2019 and 2023.

| Country        |      | Availability of KRT |    |    | Availability of CKM |                             | Funding for Medications |          |    | Availability of Distribution of Registry |          |    |     | Advocacy Group |     |                      | Nephrology Workforce (PMP) |                       |
|----------------|------|---------------------|----|----|---------------------|-----------------------------|-------------------------|----------|----|------------------------------------------|----------|----|-----|----------------|-----|----------------------|----------------------------|-----------------------|
|                |      | HD                  | PD | KT | Shared decision     | Choice restricted (limited) | CKD                     | Dialysis | KT | CKD                                      | Dialysis | KT | AKI | CKD            | AKI | Kidney failure / KRT | Nephrologist               | Nephrologist trainees |
| Andorra        | 2019 |                     |    |    |                     |                             |                         |          |    |                                          |          |    |     |                |     |                      |                            |                       |
|                | 2023 |                     |    |    |                     |                             |                         |          |    |                                          |          |    |     |                |     |                      | 0.00                       | 0.00                  |
| Austria        | 2019 |                     |    |    |                     |                             |                         |          |    |                                          |          |    |     |                |     |                      | 34.12                      | 5.69                  |
|                | 2023 |                     |    |    |                     |                             |                         |          |    |                                          |          |    |     |                |     |                      | 33.66                      | 5.61                  |
| Belgium        | 2019 |                     |    |    |                     |                             |                         |          |    |                                          |          |    |     |                |     |                      |                            |                       |
|                | 2023 |                     |    |    |                     |                             |                         |          |    |                                          |          |    |     |                |     |                      | 21.10                      | 4.22                  |
| Denmark        | 2019 |                     |    |    |                     |                             |                         |          |    |                                          |          |    |     |                |     |                      | 25.82                      | 4.48                  |
|                | 2023 |                     |    |    |                     |                             |                         |          |    |                                          |          |    |     |                |     |                      | 25.33                      | 4.05                  |
| Finland        | 2019 |                     |    |    |                     |                             |                         |          |    |                                          |          |    |     |                |     |                      | 14.45                      | 1.81                  |
|                | 2023 |                     |    |    |                     |                             |                         |          |    |                                          |          |    |     |                |     |                      | 19.64                      | 8.93                  |
| France         | 2019 |                     |    |    |                     |                             |                         |          |    |                                          |          |    |     |                |     |                      | 20.04                      | 5.05                  |
|                | 2023 |                     |    |    |                     |                             |                         |          |    |                                          |          |    |     |                |     |                      | 17.57                      | 5.86                  |
| Germany        | 2019 |                     |    |    |                     |                             |                         |          |    |                                          |          |    |     |                |     |                      | 18.64                      | 3.73                  |
|                | 2023 |                     |    |    |                     |                             |                         |          |    |                                          |          |    |     |                |     |                      | 27.01                      | 0.59                  |
| Greece         | 2019 |                     |    |    |                     |                             |                         |          |    |                                          |          |    |     |                |     |                      | 55.75                      | 7.43                  |
|                | 2023 |                     |    |    |                     |                             |                         |          |    |                                          |          |    |     |                |     |                      | 36.07                      | 9.49                  |
| Iceland        | 2019 |                     |    |    |                     |                             |                         |          |    |                                          |          |    |     |                |     |                      | 29.11                      |                       |
|                | 2023 |                     |    |    |                     |                             |                         |          |    |                                          |          |    |     |                |     |                      | 30.76                      | 0.00                  |
| Ireland        | 2019 |                     |    |    |                     |                             |                         |          |    |                                          |          |    |     |                |     |                      | 9.47                       | 5.92                  |
|                | 2023 |                     |    |    |                     |                             |                         |          |    |                                          |          |    |     |                |     |                      | 11.75                      | 9.48                  |
| Israel         | 2019 |                     |    |    |                     |                             |                         |          |    |                                          |          |    |     |                |     |                      | 29.67                      | 2.37                  |
|                | 2023 |                     |    |    |                     |                             |                         |          |    |                                          |          |    |     |                |     |                      | 24.68                      | 3.93                  |
| Italy          | 2019 |                     |    |    |                     |                             |                         |          |    |                                          |          |    |     |                |     |                      | 48.20                      | 8.03                  |
|                | 2023 |                     |    |    |                     |                             |                         |          |    |                                          |          |    |     |                |     |                      |                            | 49.10                 |
| Liechtenstein  | 2019 |                     |    |    |                     |                             |                         |          |    |                                          |          |    |     |                |     |                      | 51.88                      | 0.00                  |
|                | 2023 |                     |    |    |                     |                             |                         |          |    |                                          |          |    |     |                |     |                      | 100.73                     | 0.00                  |
| Luxembourg     | 2019 |                     |    |    |                     |                             |                         |          |    |                                          |          |    |     |                |     |                      | 21.46                      |                       |
|                | 2023 |                     |    |    |                     |                             |                         |          |    |                                          |          |    |     |                |     |                      | 12.30                      | 6.15                  |
| Malta          | 2019 |                     |    |    |                     |                             |                         |          |    |                                          |          |    |     |                |     |                      | 13.36                      | 22.27                 |
|                | 2023 |                     |    |    |                     |                             |                         |          |    |                                          |          |    |     |                |     |                      |                            | 17.23                 |
| Netherlands    | 2019 |                     |    |    |                     |                             |                         |          |    |                                          |          |    |     |                |     |                      | 17.49                      | 2.33                  |
|                | 2023 |                     |    |    |                     |                             |                         |          |    |                                          |          |    |     |                |     |                      | 15.17                      | 2.30                  |
| Norway         | 2019 |                     |    |    |                     |                             |                         |          |    |                                          |          |    |     |                |     |                      | 27.92                      | 18.61                 |
|                | 2023 |                     |    |    |                     |                             |                         |          |    |                                          |          |    |     |                |     |                      | 27.37                      | 9.00                  |
| Portugal       | 2019 |                     |    |    |                     |                             |                         |          |    |                                          |          |    |     |                |     |                      | 27.52                      | 9.66                  |
|                | 2023 |                     |    |    |                     |                             |                         |          |    |                                          |          |    |     |                |     |                      | 34.17                      | 14.65                 |
| Spain          | 2019 |                     |    |    |                     |                             |                         |          |    |                                          |          |    |     |                |     |                      | 20.27                      | 7.30                  |
|                | 2023 |                     |    |    |                     |                             |                         |          |    |                                          |          |    |     |                |     |                      | 53.01                      | 10.60                 |
| Sweden         | 2019 |                     |    |    |                     |                             |                         |          |    |                                          |          |    |     |                |     |                      | 22.91                      | 8.96                  |
|                | 2023 |                     |    |    |                     |                             |                         |          |    |                                          |          |    |     |                |     |                      | 23.85                      | 6.68                  |
| Switzerland    | 2019 |                     |    |    |                     |                             |                         |          |    |                                          |          |    |     |                |     |                      | 30.15                      | 5.12                  |
|                | 2023 |                     |    |    |                     |                             |                         |          |    |                                          |          |    |     |                |     |                      | 41.13                      | 5.88                  |
| United Kingdom | 2019 |                     |    |    |                     |                             |                         |          |    |                                          |          |    |     |                |     |                      | 9.78                       | 6.14                  |
|                | 2023 |                     |    |    |                     |                             |                         |          |    |                                          |          |    |     |                |     |                      | 12.13                      | 6.15                  |

Abbreviations: ISN, International Society of Nephrology; KRT, kidney replacement therapy; CKM, conservative kidney management; CKD, chronic kidney disease; AKI, acute kidney injury; KF, kidney failure; KT, kidney transplantation; pmp: per million population

Funding for medications refers to 100% publicly funded by the government (free at the point of delivery).

|     |                                |          |              |               |           |
|-----|--------------------------------|----------|--------------|---------------|-----------|
| Yes |                                |          |              |               |           |
| No  | Nephrologist prevalence        | <1.2 PMP | 1.2–10.0 PMP | 10.1–22.9 PMP | >22.9 PMP |
| N/A | Nephrology trainees prevalence | <0.3 PMP | 0.3–1.4 PMP  | 1.5–3.7 PMP   | >3.7 PMP  |
